# Supplementary material
Source: PubMed Central journal article supplement (PMC3408084)
Supplement: ja3009693_si_001.pdf [file ja3009693_si_001.pdf]

## Supporting Online Material

### **Chemical Characterization of the Smallest *S*-nitrosothiol, HSNO; Cellular Cross-talk of H<sub>2</sub>S and *S*-nitrosothiols**

Milos R. Filipovic,<sup>1\*</sup> Jan Miljkovic,<sup>1</sup> Thomas Nauser,<sup>2</sup> Maksim Royzen,<sup>3</sup> Katharina Klos,<sup>1</sup> Tatyana Shubina,<sup>4</sup> Willem H. Koppenol,<sup>2</sup> Stephen J. Lippard,<sup>3</sup> Ivana Ivanović-Burmazović<sup>1</sup>

## Supporting text

In order to calculate the standard Gibbs energy of the reaction

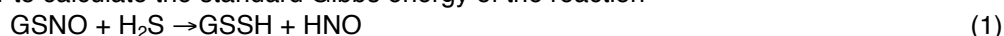

we split the reaction in 6 parts:

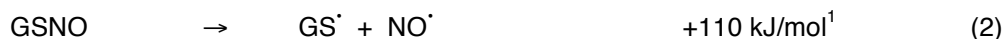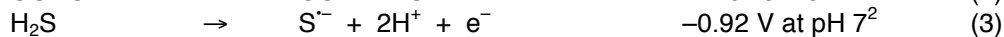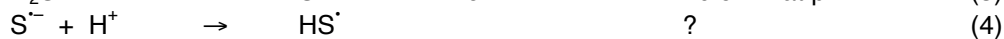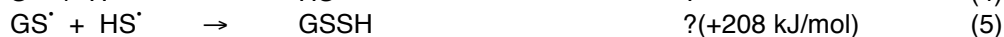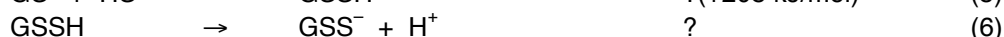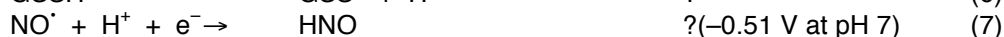

While the energetics of the the first two reactions are known, those of the last four need to be estimated.

In order to estimate standard Gibbs energy of the S–S bond in GSSH, we determine the difference with that in GSSG, 226 kJ/mol. This value follows directly from the electrode potentials of the couples  $\text{GS}^\cdot/\text{GSH}$  (+0.94 V) and  $\text{GSSG}/2\text{GSH}$ , -0.23 V.<sup>3</sup> We approximate GSSG with  $\text{CH}_3\text{SSCH}_3$ , and GSSH with  $\text{CH}_3\text{SSH}$ , and calculate, with group additivities of Benson,<sup>4</sup> the enthalpies of formation in the gas phase. The values are -12.7 kJ mol<sup>-1</sup> for  $\text{CH}_3\text{SSCH}_3$ , and -4.7 kJ mol<sup>-1</sup> for  $\text{CH}_3\text{SSH}$ . We then react these two compounds with H<sub>2</sub>:

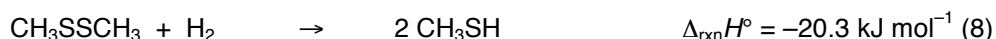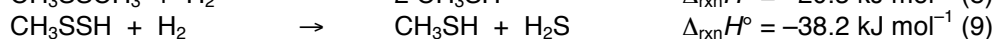

to produce  $\text{CH}_3\text{SH}$  (-22.8 kJ mol<sup>-1</sup>) and  $\text{H}_2\text{S}$  (-20.1 kJ mol<sup>-1</sup>) and oxidize them both by one electron. The enthalpy difference, 18 kJ/mol ought to be the difference in bond energy, that of  $\text{CH}_3\text{SSH}$  being smaller, 226 - 18 = 208 kJ/mol. As these reactions are carried out in parallel, all errors (mixing enthalpies with Gibbs energies, and ignoring Gibbs energies of solution) should cancel. The energetics of the oxidation of GSH and H<sub>2</sub>S by one electron are within the error identical, thus the difference in bond energy follows from the difference in the enthalpies of reduction of  $\text{CH}_3\text{SSCH}_3$  and  $\text{CH}_3\text{SSH}$  with H<sub>2</sub>.

The pK<sub>a</sub>'s of  $\text{HS}^\cdot$  and that of  $\text{CH}_3\text{SSH}$ , reactions 4 and 6 are not known. They are very likely less than 7, and we assume that they cancel. The estimated error of this assumption is 11 kJ mol<sup>-1</sup>, which would reflect a difference of 2 pH units.

The standard electrode potential of the  $\text{NO}^\cdot/\text{NO}^-$  couple is -0.8 V; the pK<sub>a</sub> of HNO is > 11.5,<sup>5</sup> and 12 was used. Given that  $\Delta_f G^\circ(\text{NO}^\cdot)$  is +102 kJ mol<sup>-1</sup>,<sup>1</sup> then  $\Delta_f G^\circ(\text{NO}^-)$  is +179 kJ mol, both in water. That of HNO is then +111 kJ mol<sup>-1</sup> at pH 0, +151 kJ mol<sup>-1</sup> at pH 7, and thus  $E^\circ(\text{NO}^\cdot, \text{H}^+/\text{HNO})$  is -0.5 V. The error is estimated at 0.1 V. Addition of the energetics of Reaction 2-7 yields  $\Delta_{\text{rxn}}G^\circ = +40 \text{ kJ mol}^{-1}$ .

### Reference List

1. Koppenol, W. H. Nitrosation, thiols, and hemoglobin: Energetics and kinetics. *Inorg. Chem.* **2012**, *51*, 5637-5641.
2. Das, T. N.; Huie, R. E.; Neta, P.; Padmaja, S. Reduction potential of the sulfhydryl radical: Pulse radiolysis and laser flash photolysis studies of the formation and reactions of  $\cdot\text{SH}$  and  $\text{HSSH}^\cdot$  in aqueous solutions. *J. Phys. Chem. A* **1999**, *103*, 5221-5226.
3. Koppenol, W. H. A thermodynamic appraisal of the radical sink theory. *Free Radical Biol. Med.* **1993**, *14*, 91-94.
4. Benson, S. W. *Thermochemical Kinetics*; 2 ed.; John Wiley & Sons: New York, 1976.
5. Farmer, P. J.; Kumar, M. R.; Almaraz, E. The coordination chemistry of HNO: From Warren Roper to hemoglobin. *Comments on Inorganic Chemistry* **2010**, *31*, 130-143.

## Supporting table

**Table S1.** Computed absolute energies (hartree) and zero-point vibrational energies (ZPVE, kcal mol<sup>-1</sup>)

|                  | E, Hartree | ZPE, kcal/mol | G, Hartree     |
|------------------|------------|---------------|----------------|
| <b>Complex 1</b> | -967.53938 | 37.86         | -967.51857     |
| <b>Complex 2</b> | -966.98458 | 32.27         | -966.96814     |
| <b>TS1</b>       | -967.49976 | 36.84         | -967.47333     |
| <b>TS2</b>       | -967.46329 | 37.60         | -967.43789     |
| <b>TS3</b>       | -966.97533 | 32.26         | -966.95714     |
| <b>TS4</b>       | -966.91952 | 31.28         | -966.90394     |
| <b>Final 1</b>   | -967.52830 | 38.25         | -<br>967.50753 |
| <b>Final 2</b>   | -967.52075 | 40.08         | -967.49146     |
| <b>Final 3</b>   | -967.00568 | 33.04         | -966.98928     |
| <b>Final 4</b>   | -966.98656 | 34.79         | -966.96486     |

## Gaussian Archives

### Complex 1

```
1\1\GINC-I01R01C02S03\Freq\RB3LYP\Aug-CC-pVTZ\C1H5N1O1S2\SHUBINA\13-Jun-2012\0\#P B3LYP/aug-cc-pVTZ OPT=(CalcAll,Noeigen,NoRaman) pop=none name=Shubina\TS--> init after IRC r N\0,1\S,-1.1949716271,-0.2108509489,-0.8669973318\N,-1.8715550941,1.4935748873,-0.7169683909\O,-2.3543416534,1.7972636486,0.3143833228\C,-1.5145674399,-0.9115157999,0.7668172672\H,-1.9916376226,-0.1301700743,1.3636372277\H,-2.1830304831,-1.7641272645,0.6804061455\H,-0.5757237199,-1.2068972767,1.2283050494\S,2.692051068,-0.7490264507,0.7795193028\H,3.0413507769,-1.8161560883,0.039560168\H,1.9295577953,-0.2374236327,-0.2046737608\Version=EM64L-G09RevB.01\State=1-A\HF=-967.5393798\RMSD=8.326e-09\RMSF=3.077e-06\ZeroPoint=0.0603352\Thermal=0.0703416\Dipole=-0.0172494,-0.7827291,0.1114791\D
```

### TS1

```
1\1\GINC-I01R12S34\FTS\RB3LYP\Aug-CC-pVTZ\C1H5N1O1S2\SHUBINA\12-Jun-2012\0\#P B3LYP/aug-cc-pVTZ OPT=(TS,ReadFc,noeigen) Freq=NoRaman pop=none name=Shubina\TS\0,1\S,-1.1884212493,-0.6360775941,-0.6414103937\N,0.3748745456,1.1483425726,-0.6565537038\O,0.1098780129,1.9443385213,0.1087351237\C,-1.8346465756,-0.1877370376,0.9886014305\H,-1.5728899849,0.8540089,1.2065851137\H,-2.9175947921,-0.2737801057,0.9741346668\H,-1.4225050306,-0.8292976384,1.763733831\S,1.9112785268,-0.6434423203,0.1822366459\H,1.6325245443,-0.3986641218,1.4770732766\H,0.2878080028,-0.996890176,-0.1813459907\Version=EM64L-G09RevB.01\State=1-A\HF=-967.4997557\RMSD=5.683e-09\RMSF=3.776e-06\Dipole=-0.7780237,0.565101,0.5290795\PG=C01 [X(C1H5N1O1S2)]\@
```

### TS2

```
1\1\GINC-I01R01C03S05\FTS\RB3LYP\Aug-CC-pVTZ\C1H5N1O1S2\SHUBINA\13-Jun-2012\0\#P B3LYP/aug-cc-pVTZ OPT=(TS,CalcFc,Noeigen) Freq=NoRaman pop=none name=Shubina\TS\0,1\S,-0.0684375373,0.9068694408,-0.3954897888
```

\N,2.2091465292,1.3301392095,-0.1443550236\O,2.8350966629,0.3994253045  
,0.0968732304\C,0.1056627071,-0.855467161,-0.0220222049\H,1.1663632392  
, -1.0896559643,0.0813088448\H,-0.4270540748,-1.0819644643,0.8943603947  
\H,-0.3220442084,-1.4146163107,-0.8481077552\S,-2.7757880476,0.9276485  
011,0.474207456\H,-2.8085564914,-0.3532230839,0.8898601682\H,-0.557148  
779,1.3370845282,0.8045146785\\Version=EM64L-G09RevB.01\State=1-A\HF=-  
967.4632898\RMSD=7.787e-09\RMSF=3.740e-06\Dipole=2.1217859,0.7440006,-  
0.073407\PG=C01 [X(C1H5N1O1S2)]\@

## Final 1

1\1\GINC-I01R12S30\Freq\RB3LYP\Aug-CC-pVTZ\C1H5N1O1S2\SHUBINA\14-Jun-2  
0120\#P B3LYP/aug-cc-pVTZ Freq=NoRaman pop=none name=Shubina\TS-->  
CH3Sh + HSNO after IRC f N\0,1\S,-2.11169,-0.91705,-0.896\N,3.12347,-  
0.05776,-1.17983\O,3.5453,0.85385,-0.58392\C,-2.47995,0.55233,0.13221\  
H,-1.93111,1.42264,-0.21713\H,-3.5453,0.73976,0.02176\H,-2.26262,0.362  
33,1.17983\S,2.31127,-1.42264,-0.17233\H,2.49732,-0.84894,1.03631\H,-0  
.79044,-0.97321,-0.64612\\Version=EM64L-G09RevB.01\State=1-A\HF=-967.5  
283025\RMSD=7.237e-09\RMSF=5.525e-05\ZeroPoint=0.0609551\Thermal=0.069  
8374\Dipole=0.169088,0.3844974,0.7190683\DipoleDeriv=-0.1041269,0.0806

## Final 2

1\1\GINC-I01R01C02S11\FOpt\RB3LYP\Aug-CC-pVTZ\C1H5N1O1S2\SHUBINA\14-Ju  
n-2012\0\#P B3LYP/aug-cc-pVTZ OPT geom=check guess=read Freq=NoRaman  
pop=none name=Shubina\TS--> fin after IRC on S\0,1\S,-0.6790733888,0  
.2396665818,1.0686532449\N,1.2309984005,-1.453463905,-0.2755674084\O,0  
.6069275523,-2.0773699139,-1.1034878473\C,-0.0418385619,1.6752674586,0  
.1385868499\H,0.7196776325,2.1254208937,0.7753111342\H,0.408743582,1.3  
489668519,-0.7940231878\H,-0.840699871,2.3895520026,-0.0399302405\S,-2  
.195518415,-0.4887033057,-0.1326471488\H,-1.4375959955,-1.2738970436,-  
0.9414970106\H,1.2160990649,-1.9812096203,0.6387316143\\Version=EM64L-  
G09RevB.01\State=1-A\HF=-967.520753\RMSD=3.159e-09\RMSF=2.541e-05\Dipo  
le=-0.1703611,-0.3420266,-0.4760828\PG=C01 [X(C1H5N1O1S2)]\@

## MeSNO

### Syn

1\1\GINC-I01R12S30\FOpt\RB3LYP\Aug-CC-pVTZ\C1H3N1O1S1\SHUBINA\12-Jun-2  
0120\#P B3LYP/aug-cc-pvtZ Opt Freq=NoRaman Name=SHUBINA\Cis (syn)\  
0,1\S,-0.4080802206,-1.1699768041,-0.0414629337\N,1.3995907907,-0.8689  
326414,0.0228706028\O,1.7648700272,0.2508779032,0.092351788\C,-1.09076  
35565,0.5007910002,0.0295943388\H,-0.245724912,1.1912909459,0.08859068  
25\H,-1.6679128254,0.7049254564,-0.8684701334\H,-1.7146093034,0.610084  
1399,0.912885655\\Version=EM64L-G09RevB.01\State=1-A\HF=-568.1060213\R  
MSD=5.712e-09\RMSF=1.806e-05\Dipole=-0.7192482,0.4302191,0.0038106\Qua  
drupole=-0.1349301,-0.2908728,0.425803,-1.3719366,-0.0882866,-0.075042  
7\PG=C01 [X(C1H3N1O1S1)]\@

### anti

1\1\GINC-I01R12S30\FOpt\RB3LYP\Aug-CC-pVTZ\C1H3N1O1S1\SHUBINA\12-Jun-2  
0120\#P B3LYP/aug-cc-pvtZ Opt Freq=NoRaman Name=SHUBINA\trans (anti  
)\0,1\C,1.58778,0.12999,-0.00003\S,0.26532,-1.10881,-0.00004\N,-1.109  
26,0.11446,-0.00007\O,-2.20034,-0.32491,-0.00002\H,2.20027,0.02068,0.8  
9076\H,2.20034,0.02061,-0.89076\H,1.10697,1.10881,-0.00009\\Version=EM  
64L-G09RevB.01\State=1-A\HF=-568.1049314\RMSD=4.484e-09\RMSF=9.727e-05  
\Dipole=0.883138,0.232134,0.0000022\Quadrupole=0.409373,-0.639301,0.22

9928,0.9542314,0.0000499,0.0000716\PG=C01 [X(C1H3N1O1S1)]\@

## H<sub>2</sub>S

1\1\GINC-I01R12S34\Freq\RB3LYP\Aug-CC-pVTZ\H2S1\SHUBINA\12-Jun-2012\0\ #P Geom=AllCheck Guess=TCheck SCRF=Check GenChk RB3LYP/Aug-CC-pVTZ Freq\H2S\0,1\S,2.4100581218,-2.0162699209,0.6129089674\H,3.7366445526,-2.0636458035,0.8281352286\H,2.2501426898,-3.3120222133,0.9351688429\ Version=EM64L-G09RevB.01\State=1-A1\HF=-399.432264\RMSD=4.047e-11\RMSF =2.939e-05\ZeroPoint=0.0150156\Thermal=0.0178645\Dipole=0.2445453,-0.2 815324,0.1126622\DipoleDeriv=-0.0509218,-0.0576874,0.0415242,-0.057687 4,-0.0386239,-0.0578155,0.0415242,-0.0578155,-0.1999873,0.0000546,0.00 3506,-0.0178622,0.062094,0.0438755,0.0274126,-0.0335374,0.0184671,0.10 08364,0.0508673,0.0541814,-0.023662,-0.0044065,-0.0052516,0.0304028,-0 .0079869,0.0393484,0.0991509\Polar=24.8073482,0.0248138,24.824234,-0.1 199316,0.1977917,25.4781164\PG=C02V [C2(S1),SGV(H2)]\NImag=0\0.281582

## Anionic

### Complex 2

1\1\GINC-I01R12S34\FOpt\RB3LYP\Aug-CC-pVTZ\C1H4N1O1S2(1-)\SHUBINA\13-J un-2012\0\ #P B3LYP/aug-cc-pVTZ Opt Freq=NoRaman Name=SHUBINA\HS(-) + CH3SNO INIT\ -1,1\S,0.9415956323,-0.3312252842,-1.0718108069\N,-0.990 6387285,0.4229224746,-0.894037344\O,-1.6734181718,0.2064669408,-1.8139 561653\C,1.4417872816,0.4032011699,0.5099627568\H,0.6381372681,1.07200 61289,0.823062083\H,1.5652888734,-0.3592172323,1.2761604679\H,2.364499 022,0.9717183326,0.391213629\S,-1.9352475768,-0.9211851968,1.203099915 1\H,-1.3086636002,-2.0321073333,0.7725654644\ Version=EM64L-G09RevB.01 \State=1-A\HF=-966.9845802\RMSD=7.305e-09\RMSF=8.502e-06\Dipole=1.4000 885,0.857063,-0.7778872\Quadrupole=-3.6571912,6.1425976,-2.4854064,-2. 8122892,7.3166914,3.4422728\PG=C01 [X(C1H4N1O1S2)]\@

## TS3

1\1\GINC-I01R12S34\Freq\RB3LYP\Aug-CC-pVTZ\C1H4N1O1S2(1-)\SHUBINA\13-J un-2012\0\ #P Geom=AllCheck Guess=TCheck SCRF=Check GenChk RB3LYP/Aug- CC-pVTZ Freq\C1H4N1O1S2\ -1,1\S,-0.449480157,0.2834494663,1.274443813 4\N,2.3359688366,0.2922306274,0.2945094045\O,3.3782864113,0.4466278368 ,0.8133007354\C,-0.6598740495,1.5909099042,0.0103550638\H,0.2838244889 ,1.7473696871,-0.521006137\H,-1.4185250241,1.3142951322,-0.7259053983\ H,-0.9577560713,2.5392165154,0.4644821921\S,1.9944251461,-1.5231408371 , -0.3961384401\H,0.691096419,-1.2042293324,-0.0667812337\ Version=EM64 L-G09RevB.01\State=1-A\HF=-966.9753342\RMSD=1.734e-09\RMSF=1.294e-05\Z eroPoint=0.0514057\Thermal=0.0587541\Dipole=0.8558145,0.3433,-0.822454 \DipoleDeriv=-1.0860795,0.2650627,0.2046698,-0.0485932,-0.5702761,-0.0 468973,0.408591,-0.2340758,-0.6859836,2.4151037,0.9913618,0.3331984,0. 0001892,0.9202147,0.6761997,1.0358345,0.8230222,0.3191154,-2.2141286,- 1.0435399,-0.4456667,-0.2270008,-0.2323909,-0.112323,-1.1661068,-0.416 6134,-0.2283742,0.1469664,-0.0824148,0.0436286,-0.0399175,0.2508217,-0 .1131737,-0.0331894,-0.0709089,0.1856439,-0.0961271,-0.1162472,0.14354 41,0.0577724,-0.0422874,0.0501042,0.0250133,0.1089455,-0.0840394,-0.10 31848,0.0605013,-0.14721,0.0339195,-0.0153106,-0.0040718,-0.1760406,0. 0848082,-0.1512363,0.0079424,0.1068833,-0.0049329,0.1407042,-0.2894362 ,0.015982,-0.0124856,-0.0371885,0.0266506,-0.4009019,0.0693529,0.07996 8,0.1632356,-1.2063038,-0.5986896,0.0614105,-0.4600904,-0.5372287,0.33 04094,-0.2509601,-0.2071992,-0.0803094,0.1849686,0.1328696,-0.1430269, 0.2021011,0.1554524\Polar=153.7955111,-20.3915551,118.0534764,-21.1171 629,16.9725717,98.8641226\PG=C01 [X(C1H4N1O1S2)]\NImag=1\

## TS4

1\1\GINC-I01R12S34\FTS\RB3LYP\Aug-CC-pVTZ\C1H4N1O1S2(1-)\SHUBINA\13-Jun-2012\0\#P B3LYP/aug-cc-pVTZ geom=check guess=read Opt=(ReadFc,TS,no eigen) Freq=NoRaman Name=SHUBINA\C1H4N1O1S2\1,1\S,0.4665150049,0.2034281281,-0.9796822425\N,2.936870537,0.762030356,0.5834550959\O,2.9459303179,-0.0800013354,1.4049494335\C,-0.2129095463,-0.7324250397,0.4245991021\H,0.5702016572,-0.974138485,1.1470981772\H,-0.9884402059,-0.1516869674,0.9245231175\H,-0.6459908682,-1.6626078368,0.0508158376\S,0.3366178681,2.5240348849,0.1683001385\H,1.5555352354,2.3511802952,0.7377883402\Version=EM64L-G09RevB.01\State=1-A\HF=-966.9195176\RMSE=5.235e-09\RMSF=3.104e-05\Dipole=-0.0805059,-0.8943405,0.5415809\Quadrupole=0.9291588,-2.1800184,1.2508597,3.3866949,-1.7914608,-0.8449547\PG=C01 [X(C1H4N1O1S2)]\@

## Final 3

1\1\GINC-I01R12S34\FOpt\RB3LYP\Aug-CC-pVTZ\C1H4N1O1S2(1-)\SHUBINA\13-Jun-2012\0\#P B3LYP/aug-cc-pVTZ Opt Freq=NoRaman Name=SHUBINA\SNO(-) + CH3SH\1,1\S,1.5458737252,-0.9261000896,-0.9510060791\N,-1.9698498558,0.9184033288,-0.1382273443\O,-2.9676363257,1.5785826262,0.1220503316\C,1.5083331408,0.2194408862,0.4811516391\H,0.6415620346,0.8693588031,0.3868758303\H,1.447586276,-0.3310786761,1.4181704758\H,2.4221127341,0.8110769806,0.4695044365\S,-2.1809068407,-0.633781773,-0.8747797132\H,0.1743051115,-1.0045920862,-1.0690395767\Version=EM64L-G09RevB.01\State=1-A\HF=-967.0056766\RMSE=7.904e-09\RMSF=1.562e-05\Dipole=1.8773024,-0.0275151,0.4594096\Quadrupole=-9.8589496,2.5500205,7.308929,5.771557,2.4537682,-1.796994\PG=C01 [X(C1H4N1O1S2)]\@

## Final 4

1\1\GINC-I01R12S34\FOpt\RB3LYP\Aug-CC-pVTZ\C1H4N1O1S2(1-)\SHUBINA\14-Jun-2012\0\#P B3LYP/aug-cc-pVTZ OPT geom=check Freq=NoRaman guess=read pop=none name=Shubina\FIN4\1,1\S,-0.4837418794,0.6581484931,0.8127399692\N,1.8531150404,-0.8850995448,0.5752564689\O,2.5421485067,-0.5181818527,-0.3783158201\C,0.1425964717,1.6468021849,-0.5849052092\H,0.8941593473,1.0792288387,-1.1382179907\H,-0.6832510592,1.9144733602,-1.2419411326\H,0.5996383118,2.5482347779,-0.170701753\S,-1.5681606656,-0.8710110507,-0.06037754\H,0.9474771583,-1.2694009263,0.2156426733\Version=EM64L-G09RevB.01\State=1-A\HF=-966.9865575\RMSE=9.236e-09\RMSF=2.962e-05\Dipole=0.4714638,1.048293,-0.31138\PG=C01 [X(C1H4N1O1S2)]\@

## HS<sup>-</sup>

1\1\GINC-I01R12S34\Freq\RB3LYP\Aug-CC-pVTZ\H1S1(1-)\SHUBINA\13-Jun-2012\0\#P Geom=AllCheck Guess=TCheck SCRF=Check GenChk RB3LYP/Aug-CC-pVTZ Freq\H2S\1,1\S,2.5181195115,-2.1369343945,0.6616920163\H,3.8354324885,-1.8740886055,0.7925029837\Version=EM64L-G09RevB.01\State=1-SG\HF=-398.8671264\RMSE=4.398e-10\RMSF=3.431e-06\ZeroPoint=0.0059892\Thermal=0.0083497\Dipole=0.2059752,0.0410986,0.0204536\DipoleDeriv=-0.7169423,0.0612681,0.0304914,0.0612681,-1.0117769,0.006084,0.0304914,0.006084,-1.0209739,-0.2830577,-0.0612681,-0.0304914,-0.0612681,0.0117769,-0.

## Supporting figures

A

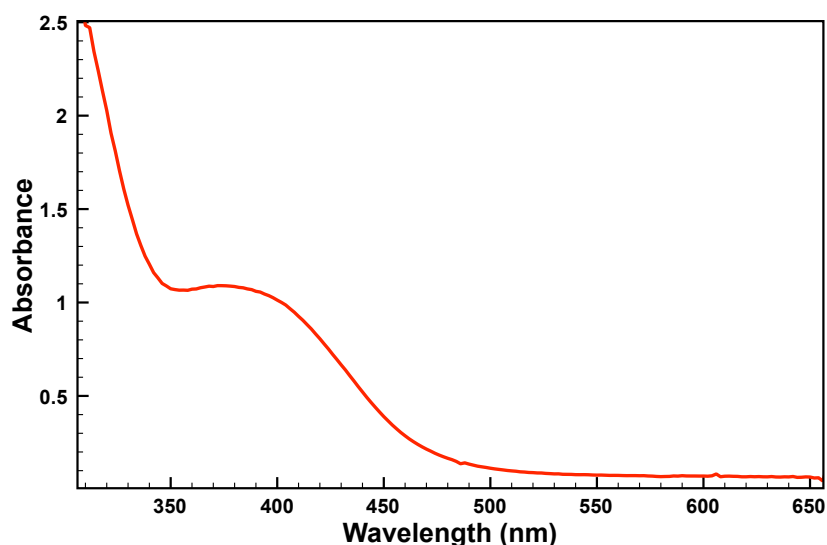

B

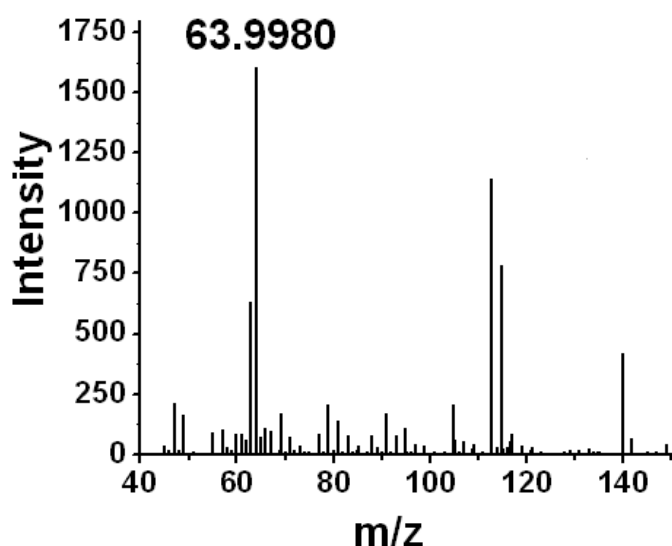

**Figure S1. Generation of HSNO by acidification of solution containing nitrite and sulfide.**

A) UV-Vis spectrum of neutralized solution of HSNO. HSNO was prepared by acidification of 100 mM nitrite with 100 mM HCl, followed by addition of sodium sulfide (final concentration 10 mM). This led to a colour change characteristic of S-nitrosothiol formation. The solution was rapidly neutralized using 300 mM phosphate buffer pH 7.4. The broad peak at 370 nm represents a mixture of unreacted nitrite (350 nm), HSNO (335 nm, determined by pulse radiolysis in this study) and  $\text{HSS}^{2-}$  (380 nm). **B) Mass spectrum of HSNO prepared by acidification of nitrite in the presence of sulphide.** The peak at  $m/z$  64 was assigned to  $[\text{HSNO} + \text{H}^+]^+$ .

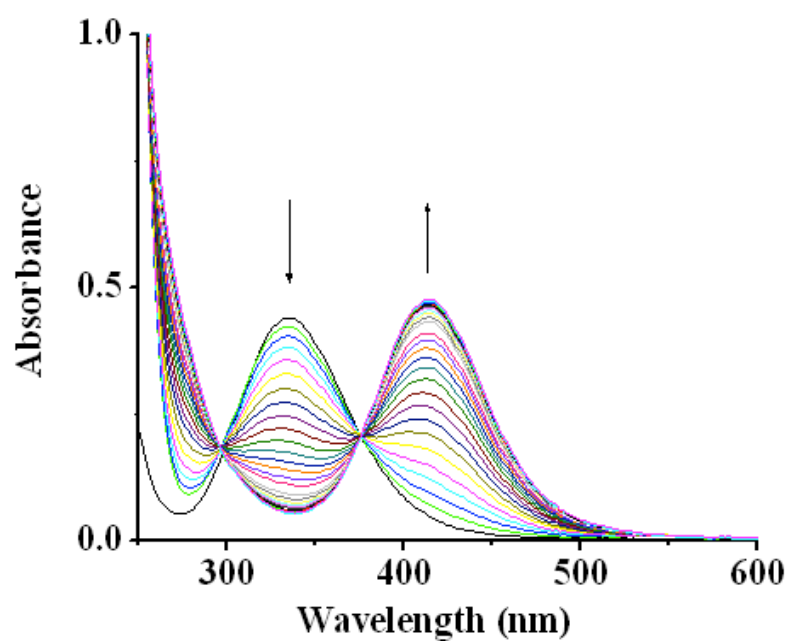

**Supplementary Figure S2.** Time resolved UV-Vis spectra (collected every 4s) at 37 °C of buffered *S*-nitroso glutathione (0.5 mM) upon addition of sodium sulfide (0.5 mM). Decrease of the characteristic *S*-nitroso peak at 334 nm parallels the appearance of the new species at 412 nm which does not correspond to HSNO but, instead, to the mixed polysulfides as explained in the main text.



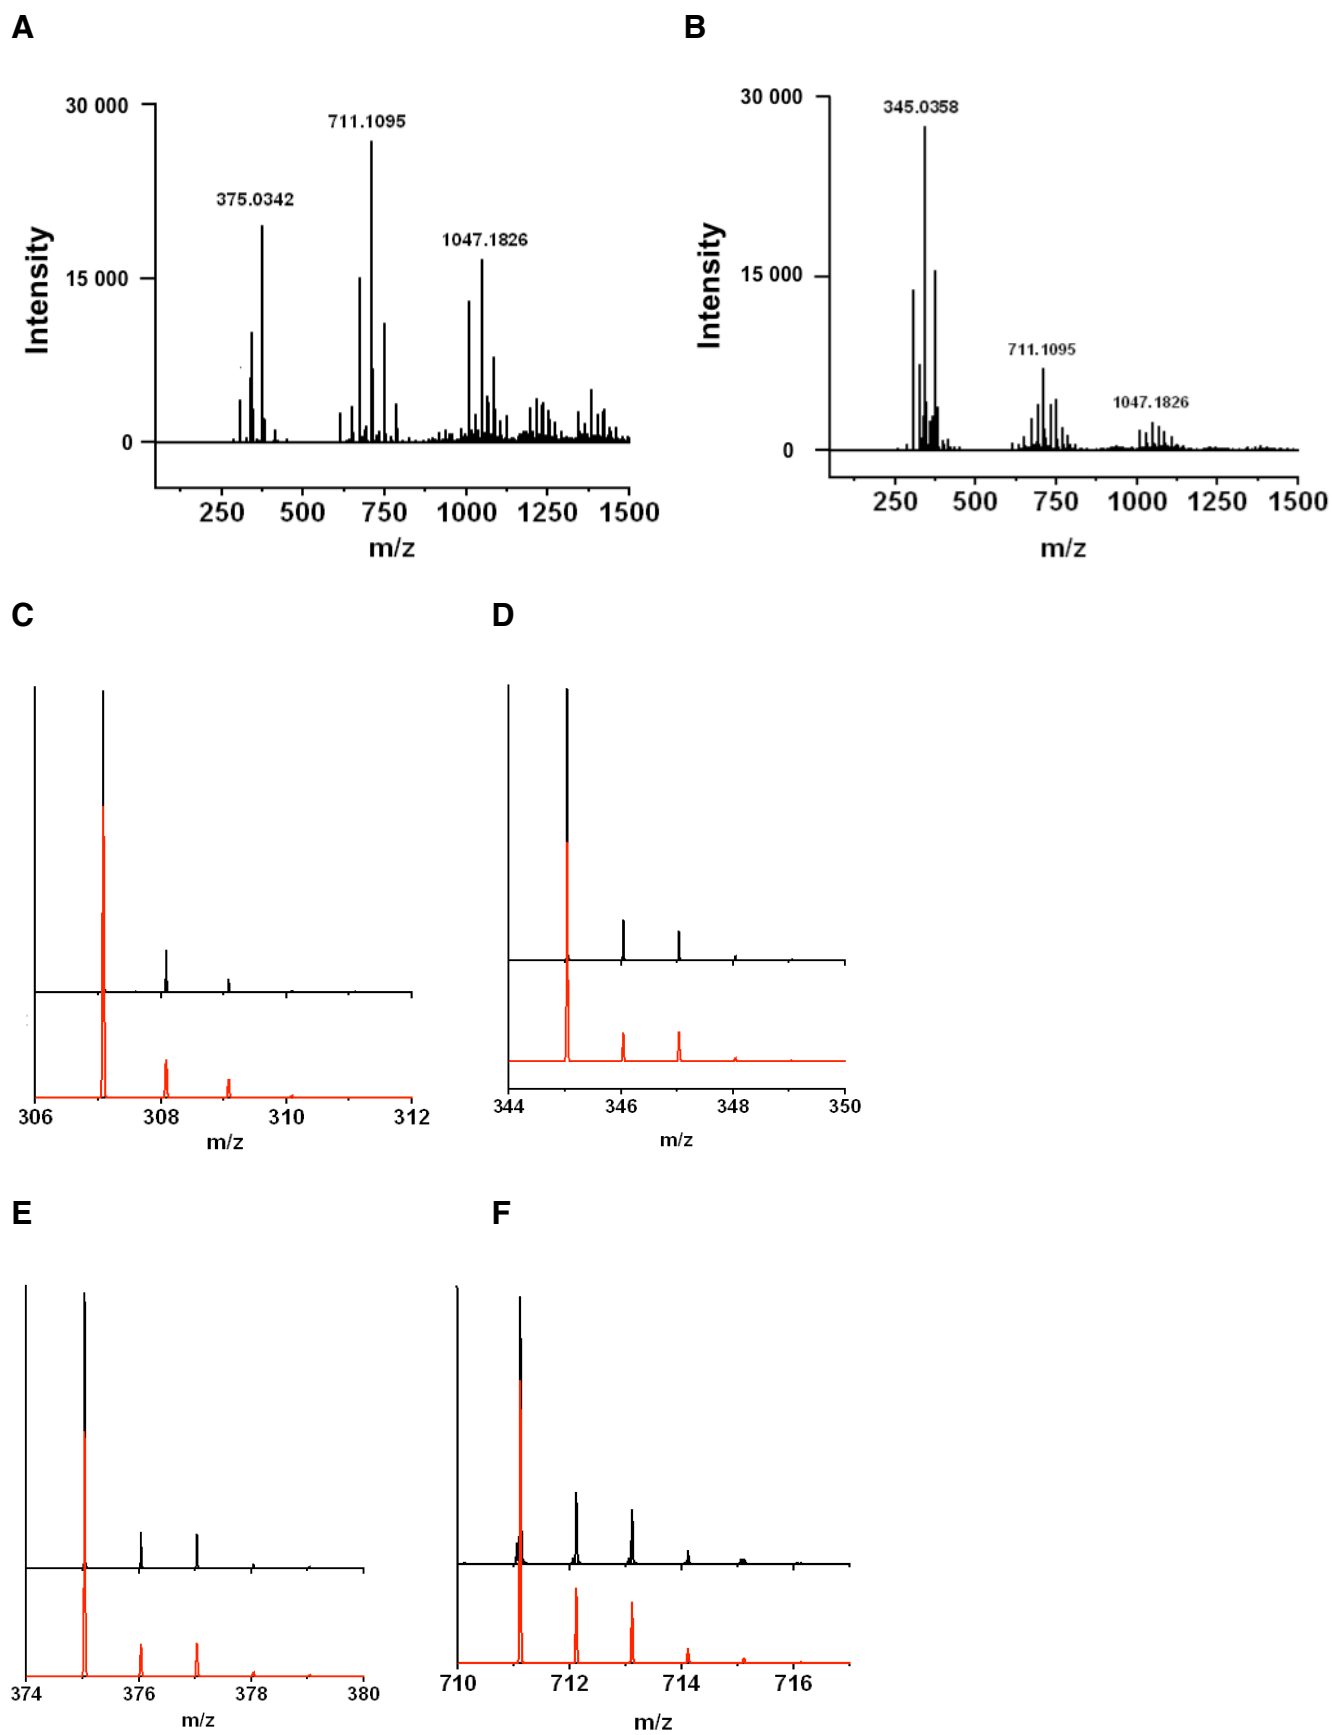

**G**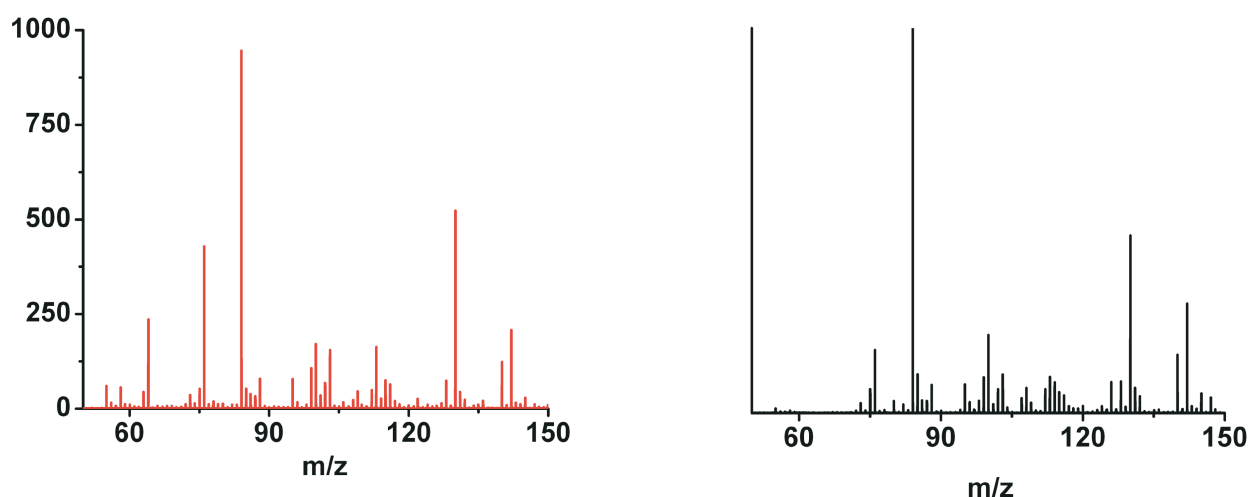**H**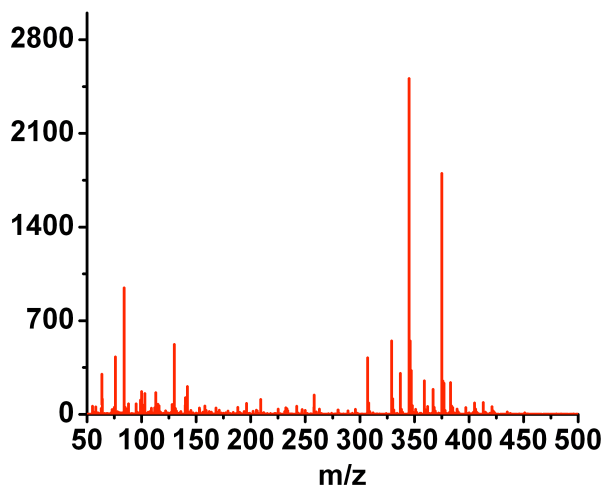

**Supplementary Figure S3. ESI-TOF mass spectrometry of the reaction mixture containing GSNO and H<sub>2</sub>S.** a) Mass spectrum of GSNO. S-Nitrosoglutathione gives three particularly intense peaks at  $m/z$  375.0342, 711.1095 and 1047.1826, which correspond to  $[\text{GSNO}]\text{K}^+$ ,  $[\text{GSNO}]_2\text{K}^+$ , and  $[\text{GSNO}]_3\text{K}^+$ , respectively. b) Mass spectrum of GSNO mixed with H<sub>2</sub>S. The major peak at  $m/z$  345.0358 is assigned to decomposed S-nitroso glutathione  $[\text{GS}\cdot + \text{K}]^+$  or  $[\text{GSSG} + 2\text{K}]^+$ . c-f) Comparison of the original (black) spectrum with the simulated one (red) for peaks at c)  $m/z$  307  $[\text{GS}\cdot + \text{H}^+]^+$ , d)  $m/z$  345  $[\text{GS}\cdot + \text{K}]^+$ , e)  $m/z$  375  $[\text{GSNO} + \text{K}]^+$  and f)  $m/z$  711  $[\text{GSNO}]_2\text{K}^+$ . g) Low mass range spectral analysis of the reaction mixture containing GSNO and H<sub>2</sub>S. The spectra are collected in a mode that focuses on low mass range only in a solution containing 150 mM potassium phosphate buffer. The arrow indicates appearance of a  $m/z$  64 signal, assigned to  $[\text{HSNO} + \text{H}^+]^+$  in the spectrum of the

mixture (red) that is absent in the control spectrum of GSNO (black). **h) The whole low mass range spectrum presented for comparison.**

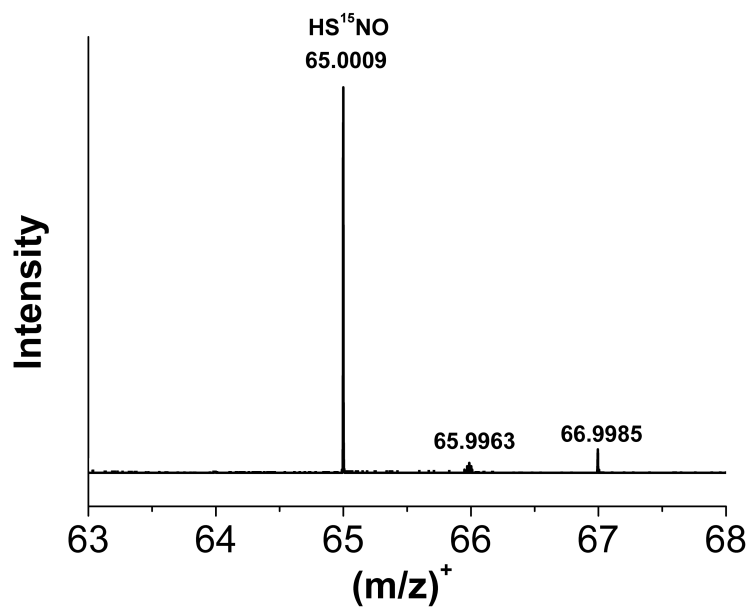

**Supplementary Figure S4. Mass spectrum of HS<sup>15</sup>NO prepared by mixing GS<sup>15</sup>NO and H<sub>2</sub>S.** 0.3 equiv portion of H<sub>2</sub>S was mixed with buffered 1 mM GS<sup>15</sup>NO (pH 7.4), protected from light and injected directly into the maXis (Bruker Daltonics), high-resolution mass spectrometer.

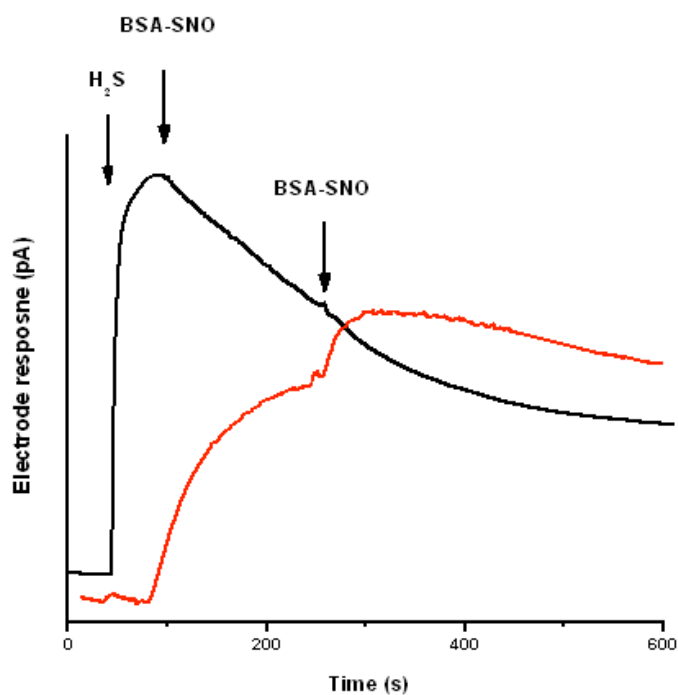

**Supplementary Figure S5. Amperometric recordings from NO (red) and H<sub>2</sub>S electrode (black) measurements during the reaction of hydrogen sulfide with S-nitroso albumin.** A 50  $\mu$ M solution of sodium sulfide was injected into 50 mM potassium phosphate buffer, pH 7.4. After some time, S-nitrosoalbumin (prepared by transnitrosation of albumin with S-nitrosocysteine and then dialyzed for 24 h in dark) was injected as indicated by the arrows. Decay of H<sub>2</sub>S from the solution (black line) parallels the rise of the signal from an NO electrode (red line).

**A**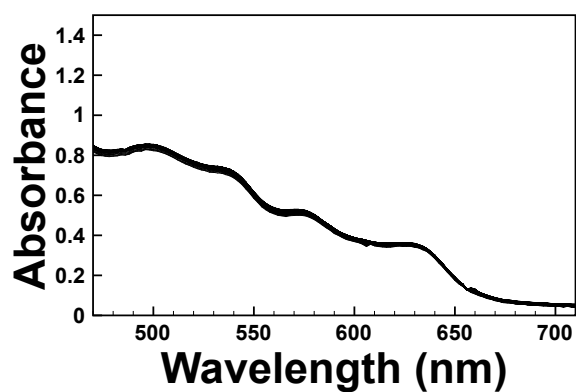**B**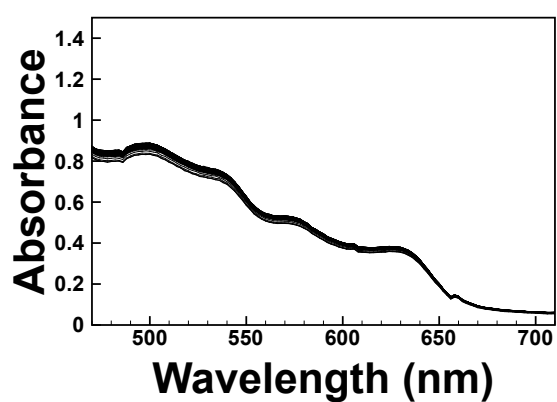

**Supplementary Figure S6. Spectral changes of methemoglobin upon addition A) GSNO and B) just H<sub>2</sub>S.** 100  $\mu$ M GSNO or 200  $\mu$ M sodium sulphide were added to 50  $\mu$ M metHb in 50 mM potassium phosphate buffer pH 7.4 and the reaction was followed every 10 s for a total of 5 min.

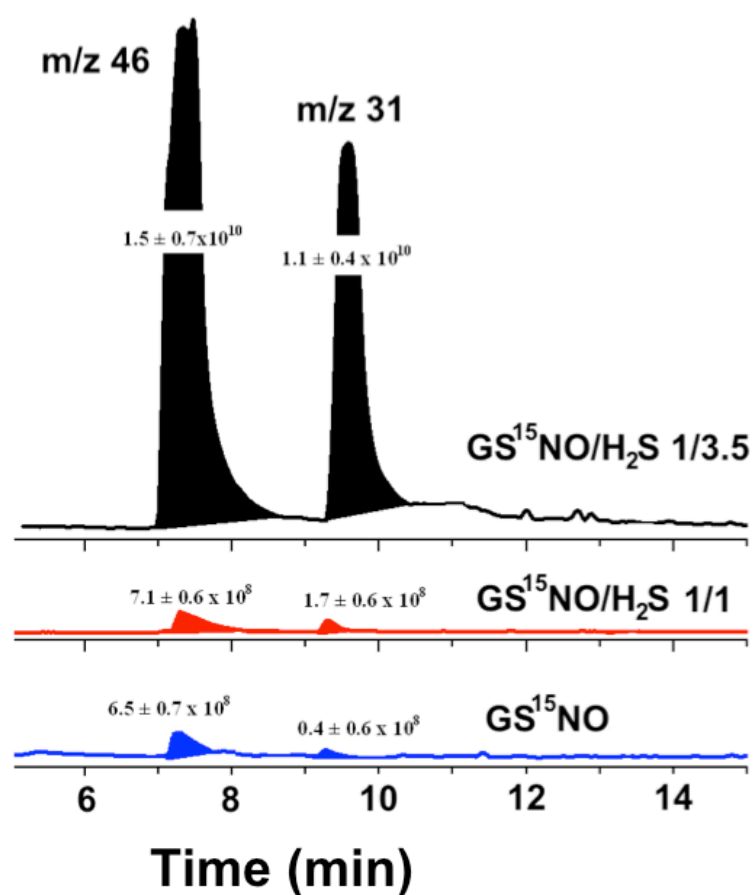

**Figure S7.** N<sub>2</sub>O and NO· formation from the reaction of GS<sup>15</sup>NO with Na<sub>2</sub>S. A 5 mM GS<sup>15</sup>NO solution in 50 mM potassium phosphate buffer, pH 7.4, (blue) was degassed with argon and mixed with Na<sub>2</sub>S to give a ratio of 1:1 (red) or 1:3.5 (black). Fifteen min after sulfide addition, the headspace gas was analyzed for ions m/z 46 (<sup>15</sup>N<sub>2</sub>O) and 31 (<sup>15</sup>NO) by GC-MS. The values given in the figure represent the calculated areas under the corresponding curves.

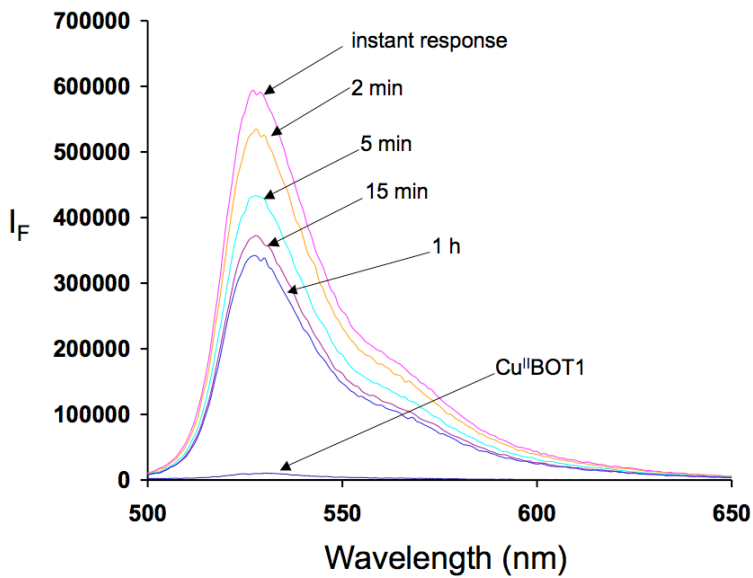

**Supplementary Figure S8. *In vitro* reaction of CuBOT1 with H<sub>2</sub>S.** Intracellular formation of HNO was visualized using CuBOT1, a fluorescent sensor for nitroxyl.<sup>16</sup> The ability of H<sub>2</sub>S to reduce CuBOT1 directly, *in vitro*, was also tested. The figure presents the fluorescence response of 3  $\mu$ M CuBOT1 to 300  $\mu$ M H<sub>2</sub>S ( $\lambda_{ex} = 450$  nm). The spectra were acquired in 50 mM PIPES buffer, 100 mM KCl, pH 7.0, 37 °C. However, as for other reducing agents (glutathione and cysteine),<sup>16</sup> this response does not occur inside the cells, making this probe suitable for HNO detection under the experimental conditions used in this study



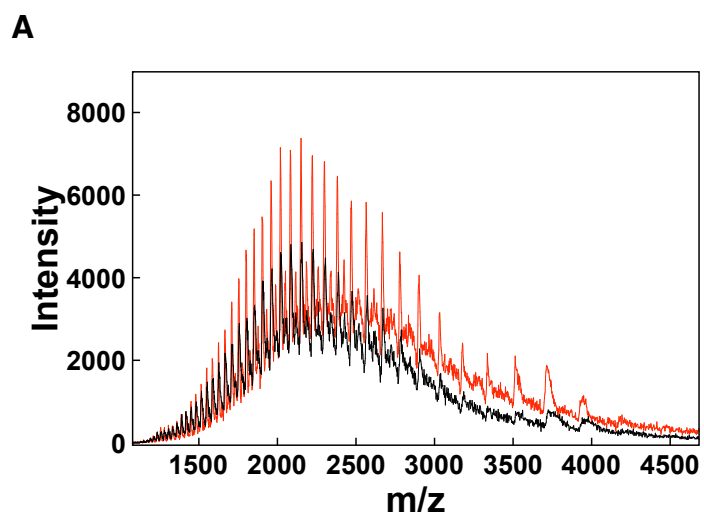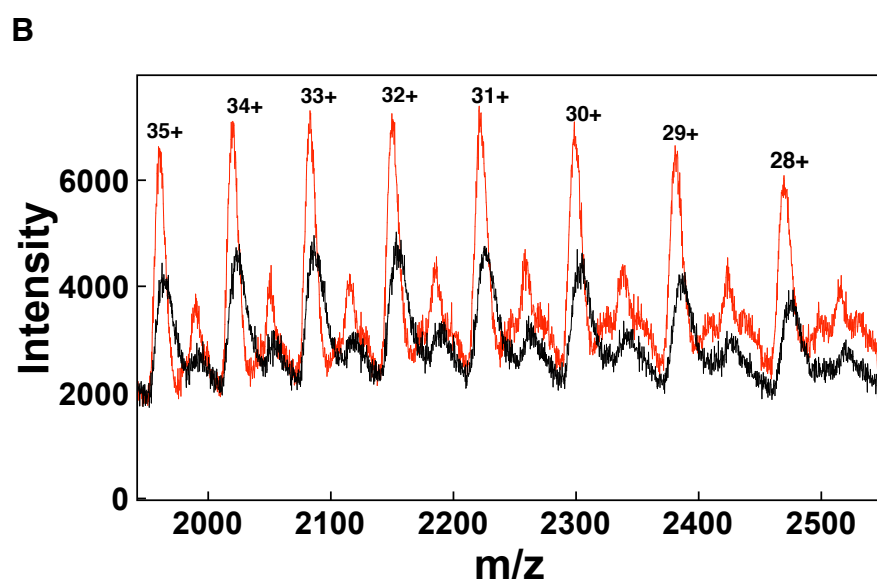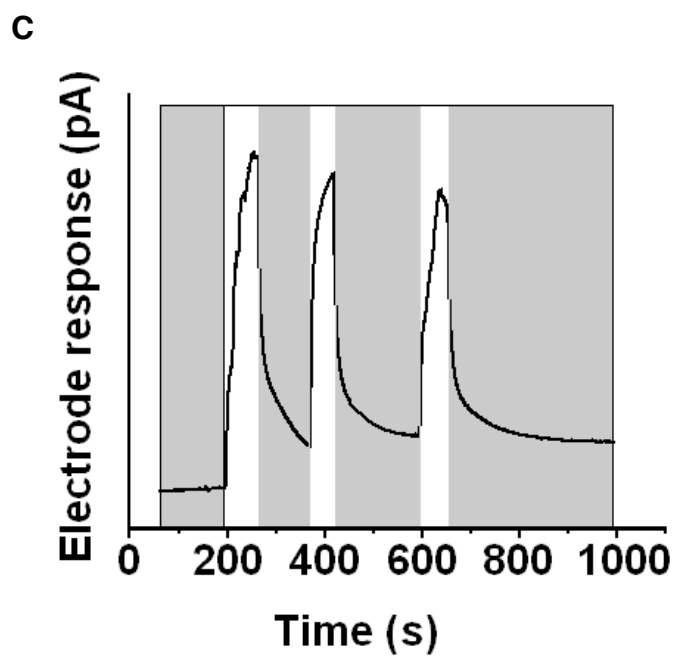

**Figure S9. A) ESI-TOF mass spectrum of S-nitroso-albumin obtained by reaction of albumin with HSNO formed from S-nitrosoglutathione and sulfide.** A 1 mM solution of GSNO was incubated with 1 mM Na<sub>2</sub>S in 300 mM potassium phosphate buffer, pH 7.4, for 5 min, to assure that all GSNO reacted to form HSNO. Next, 200 μM bovine serum albumin (BSA) was added to the solution and allowed to incubate for 15 min. The solution was dialyzed against water for 24 h and prepared for mass spectrometry in an acetonitrile/methanol mixture (1:1, v/v) containing 0.1 % formic acid. The red trace represents the mass spectrum of native BSA, the black trace is the spectrum of HSNO-treated protein. **B) Enlarged central part of the spectrum.** For example, the 31<sup>+</sup> peak was shifted upwards by m/z 3.77 which corresponds well to the value calculated for the addition of 4 nitroso equivalents ( $[\text{BSA} - 4\text{H} + 4\text{NO}]^{31+} = [4 \times 29]/31 = 3.74$ ). **C) Light activated NO· release from poly-nitrosated bovine serum albumin.** Polynitrosated albumin releases NO· on exposure to light, as detected by an NO electrode. Subsequent irradiation of the same sample led to gradual reduction in NO quantities released due to decreasing amounts of S-nitrosated material remaining.

A

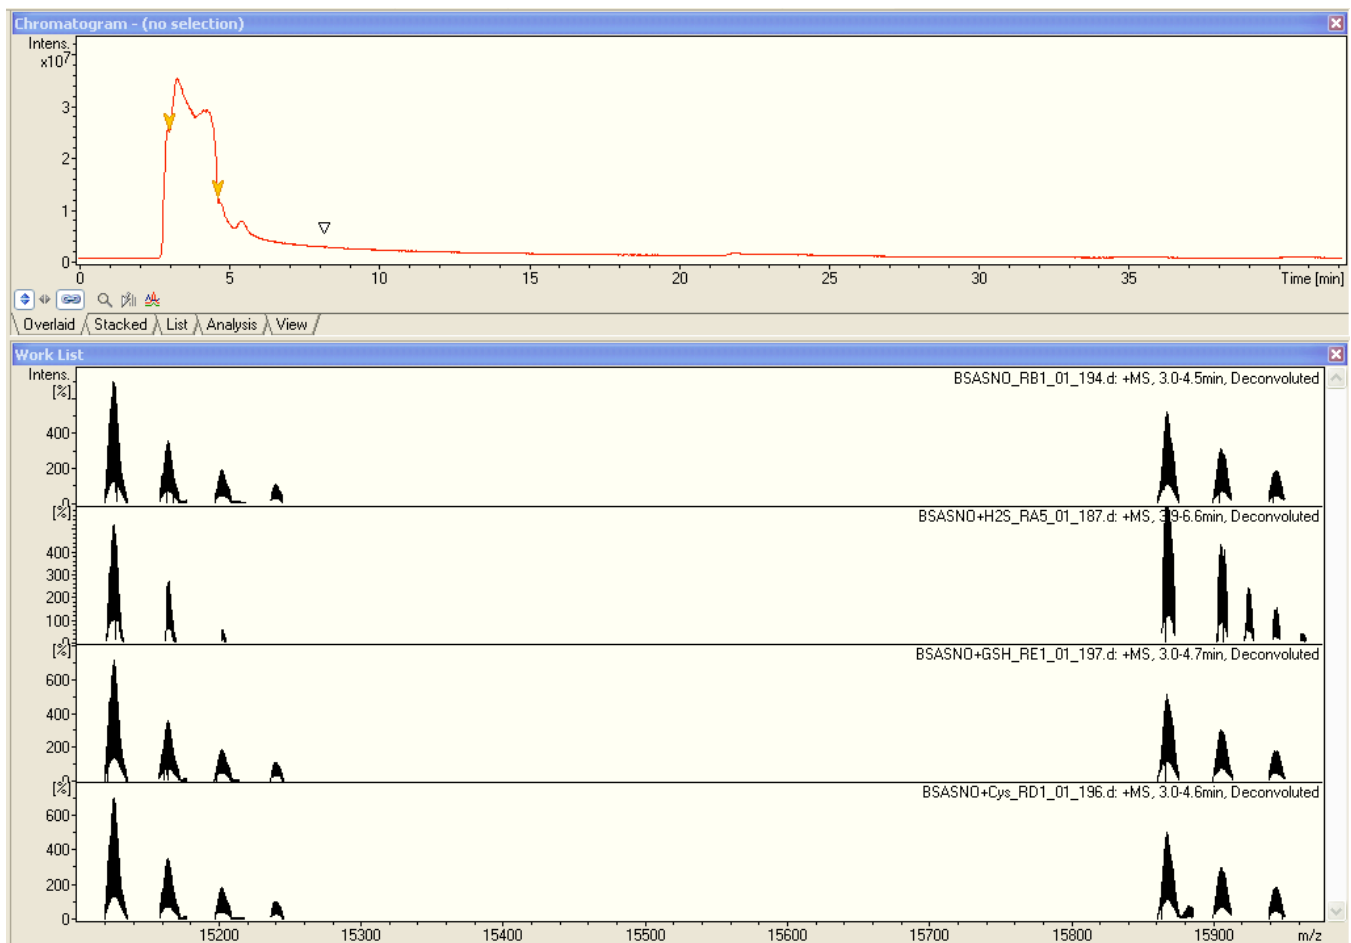

**B**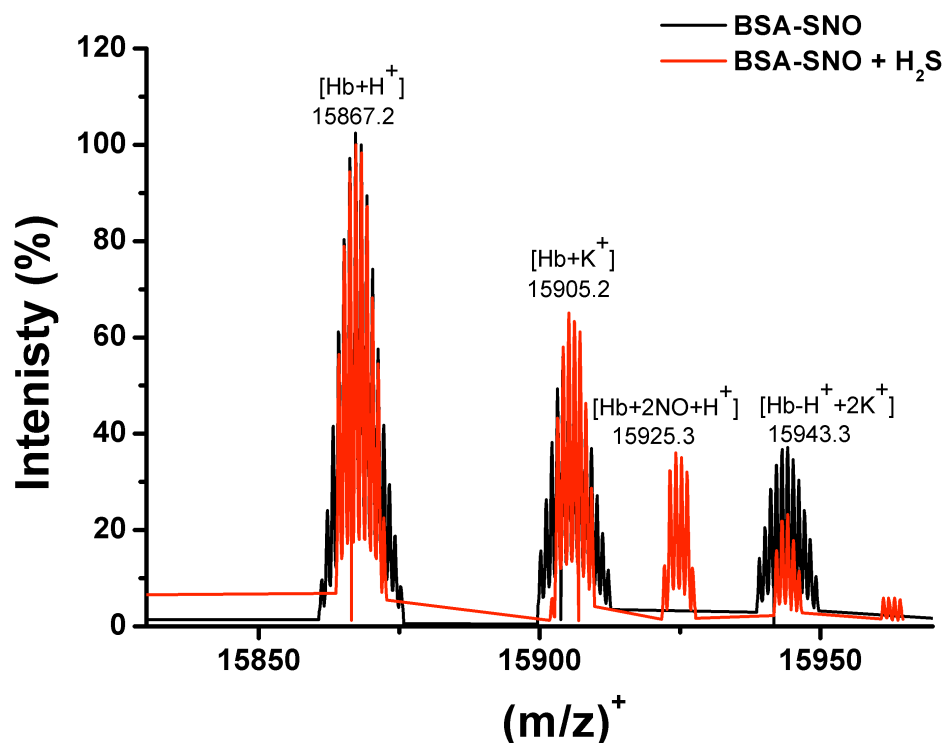

**Figure S10.** LC-ESI-TOF MS analysis of hemoglobin from red blood cells (RBC) treated with BSA-SNO, BSA-SNO + H<sub>2</sub>S, BSA-SNO + GSH and BSA-SNO + Cys. A) Original data obtained from the experiments, analyzed by Data Analysis software (Bruker Daltonics). The spectra depict MS chromatogram and corresponding spectra of hemoglobin (Hb) alpha and beta subunits. Only when the combination of BSA-SNO and H<sub>2</sub>S was used, an additional peak was observed assigned to [ $\beta$ Hb+2NO+H]<sup>+</sup>. No changes in  $\alpha$ Hb were observed in any of the samples. B) Enlarged spectrum of  $\beta$ Hb after the RBC were treated with BSA-SNO only (black) or BSA-SNO + H<sub>2</sub>S (red). 20  $\mu$ M washed RBC were diluted 100x with PBS and exposed to 100  $\mu$ M poly BSA-SNO (prepared by acidification of BSA/nitrite mixture and then further purified on micro Bio-Spin column) without or with addition of 100  $\mu$ M H<sub>2</sub>S, 100  $\mu$ M GSH or 100  $\mu$ M Cys. 2 min after the addition of BSA-SNO the samples were centrifuged for 3 min at 3000xg and then washed with PBS 3 times prior the hemolysis with nanopure water supplemented with 100  $\mu$ M neocuproine. Samples (20  $\mu$ L) were separated on LC and subsequently analyzed by ESI-TOF-MS. LC separation was done using following protocol: column was equilibrated with a 50:50 mixture of buffer A (80:20, water:acetonitrile; 0.1% trifluoroacetic acid) and buffer B (40:60, water:acetonitrile; 0.1% trifluoroacetic acid) at a flow rate of 1 ml/min. 20  $\mu$ L of each sample was loaded and eluted with a 2-min hold at 50% B, followed by a linear gradient to 66% B over 40 min.
